# Supplementary material for: Assessment of clinical effect of long-term administration of maintenance temozolomide therapy in patients with IDH1/2-wildtype glioblastoma
Source: Research Square preprint supplement (doi:10.21203/rs.3.rs-1492448/v1), 2022-03-30
Supplement: Supplementary file 1 [file 3df23514c52cb148d2e87060.xlsx]

## Sheet: Table 1
Table 1: Patient characteristics of 41 patients with IDH1/2-wildtype glioblastoma
	No. (%) of Patients
Age at 12 cycles (yr)
Median	62
Range	30-82
Sex
Male	24 (58.5)
Female	17 (41.5)
Karnofsky performance status at 12 cycles
100	1 (2.4)
90	18 (43.9)
80	7 (17.1)
70	8 (19.5)
60	7 (17.1)
Maintenance temozolomide cycle
12 cycles	25 (61.0)
≥13 cycles	16 (39.0)
Maintenance therapy regimen
Temozolomide	27 (65.9)
Temozolomide/Bevacizumab	7 (17.1)
Temozolomide/Tumot treating fields	6 (14.6)
Temozolomide/Nivolumab	1 (2.4)
Residual tumor at 12 cycles
Yes	25 (61.0)
No	16 (39.0)
Treatment after first tumor recurrence
Best supportive care	7 (17.1)
Chemotherapy	16 (39.0)
Surgery + chemotherapy	5 (12.2)
Radiation therapy + chemotherapy	2 (4.9)
No recurrence	10 (24.4)
Radiation therapy	1 (2.4)
MGMT promoter status
Hypermethylation	28 (68.3)
Hypomethylation	13 (31.7)
MGMT O6-methylguanine DNA methyltransferase

## Sheet: Table 2
	Table 2: Summary of median residual progression-free survival time and residual survival time in 41 patients with IDH1/2-wildtype glioblastoma
	Variable	No. of Patients	Residual progression free survival (months)	p value	Residual survival time (months)	p value
	Age at 12 cycles
	< 50 years	9	10.6	0.85	Not reached	0.46
	≥ 50 years	32	11.3		25.7
	Karnofsky performance status at 12 cycles
	< 80	15	6.1	0.22	15.3	<0.0001
	≥80	26	11.3		74.9
	Residual tumor at 12 cycles
	Yes	25	5.8	0.72	25.7	0.13
	No	16	11.4		74.9
	Maintenance therapy regimen
	Temozolomide alone	28	11.3	0.046	30.2	0.38
	Combined therapy	13	8.2		19
	Maintenance temozolomide cycle
	12 cycles	25	11.3	0.61	25.7	0.76
	≥13 cycles	16	9.2		30.2
	MGMT promoter status
	Hypomethylation	13	5.5	0.19	26.7	0.59
	Hypermethylation	28	12.2		30.2
	MGMT: O-6-methylguanine DNA methyltransferase

## Sheet: Table 3
	Table 3: Multivariate analysis of 41 patients with IDH1/2-wildtype glioblastoma
	Variable	No. of Patients	Hazard ratio for residual progression free survival (95% CI)	p-value	Hazard ratio for residual survival time (95% CI)	p-value
	Karnofsky performance status at 12 cycles
	< 80	15	1	0.4	1	0.0007
	≥80	26	0.70 (0.31-1.60)		0.12 (0.035-0.41)
	Residual tumor at 12 cycles
	Yes	25	1	0.83	1	0.68
	No	16	1.10 (0.48-2.51)		0.80 (0.27-2.33)
	Maintenance therapy regimen
	Temozolomide	28	1	0.17	1	0.56
	Combined therapy	13	1.83 (0.77-4.83)		0.72 (0.24-2.15)
	Maintenance temozolomide cycle
	12 cycles	25	1	0.86	1	0.4
	≥13 cycles	16	1.08 (0.47-2.48)		1.58 (0.55-4.60)
	MGMT promoter status
	Hypomethylation	13	1	0.4	1	0.28
	Hypermethylation	28	0.69 (0.29-1.64)		0.53 (0.17-1.68)
	MGMT: O-6-methylguanine DNA methyltransferase
